# Supplementary material for: Role of vacancies to p-type semiconducting properties of SiGe nanowires
Source: Royal Society of Chemistry journal article supplement (doi:10.1039/c4tc00958d), 2014-01-01
Supplement: c4tc00958d1.pdf [file c4tc00958d1.pdf]

## Electronic Supplementary Information

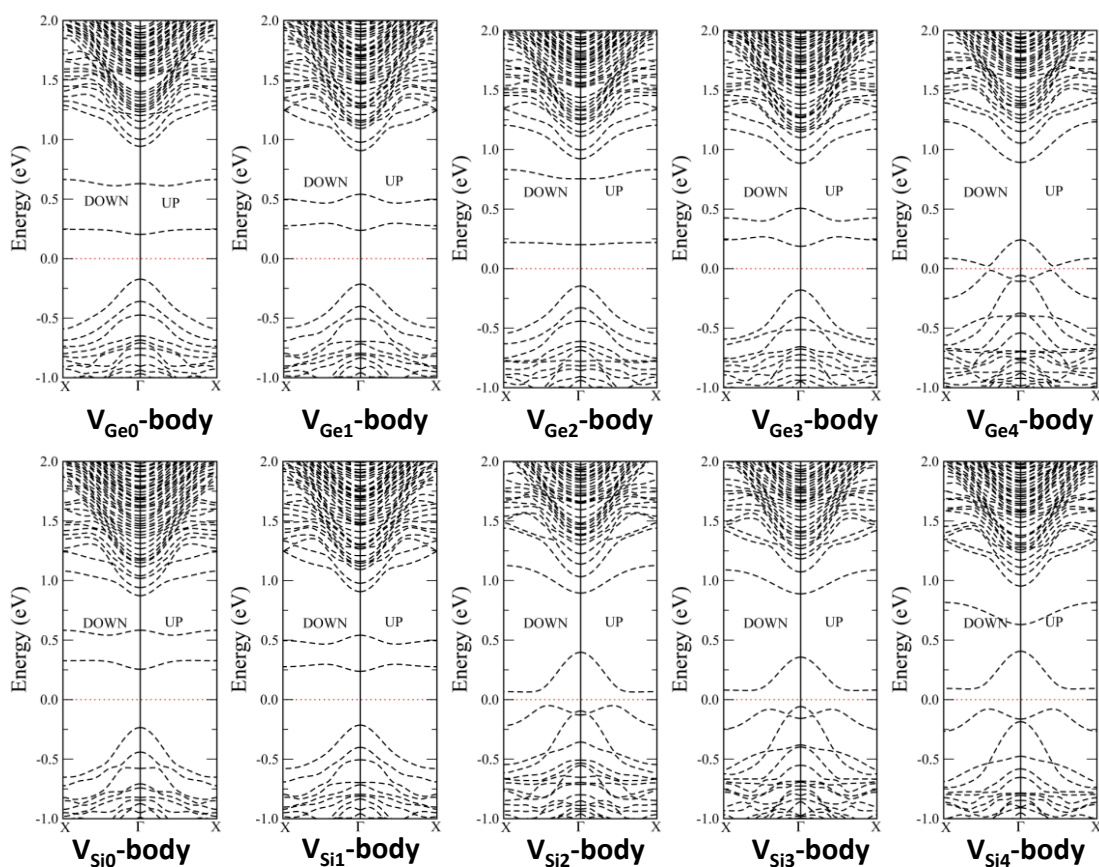

**Figure S1** Computed band structures of the random-distributed triangular-prism (RTP) Si/Ge NWs with Ge and Si single vacancy in the body.

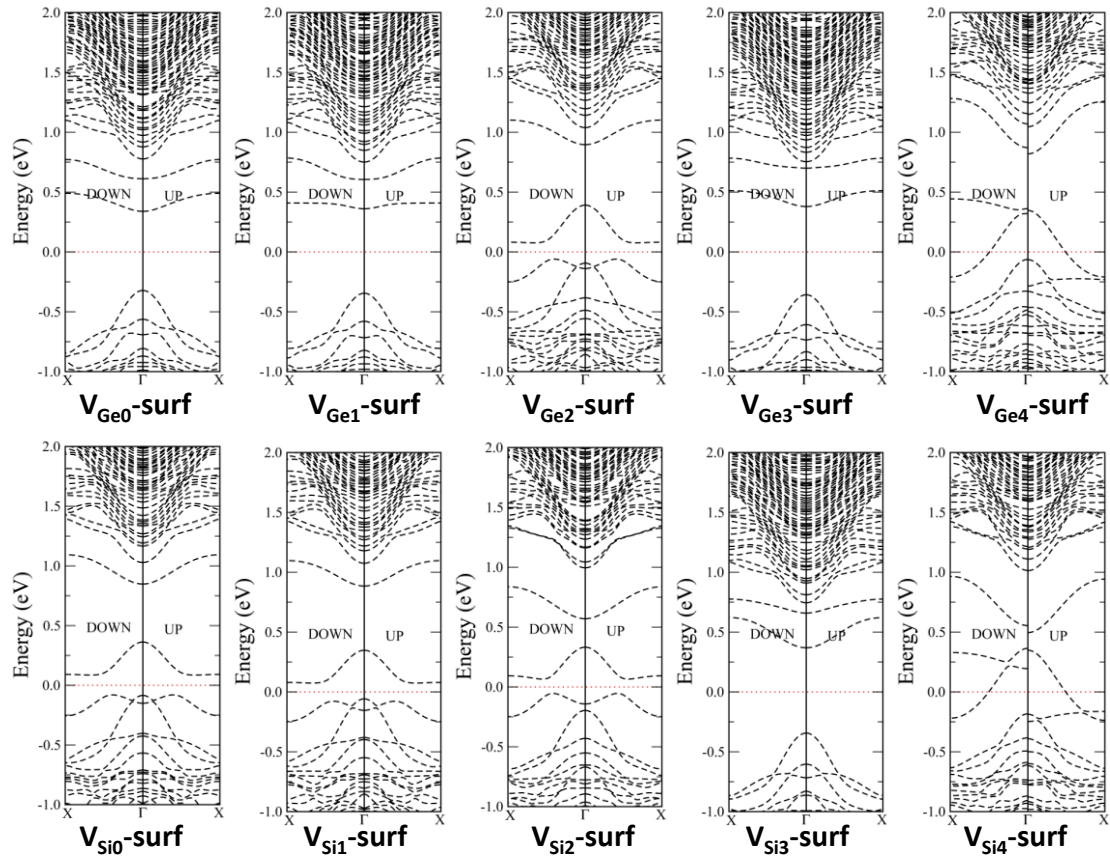

**Figure S2** Computed band structures of the random-distributed triangular-prism (RTP) Si/Ge NWs with Ge and Si single vacancy on the surface.
